# Supplementary material
Source: PubMed Central journal article supplement (PMC6900520)
Supplement: pnas.1908113116.sd01.pdf [file pnas.1908113116.sd01.pdf]

**Dataset S1: Numbers of differentially expressed genes in the striata of R6/1 and CHL2 mice**

| 0.5LFC, 5%FDR                            | <b>R6/1 4 weeks</b> |        | <b>R6/1 8 weeks</b> |        | <b>CHL2 1 year</b> |        |
|------------------------------------------|---------------------|--------|---------------------|--------|--------------------|--------|
| Direction of change                      | lower               | higher | lower               | higher | lower              | higher |
| Number of differentially-expressed genes | 24                  | 26     | 609                 | 78     | 173                | 150    |
