# Supplementary material
Source: PubMed Central journal article supplement (PMC6900520)
Supplement: pnas.1908113116.sd07.pdf [file pnas.1908113116.sd07.pdf]

Dataset S7

TRANSFAC MOTIFS

In lower H3K27acetylated sites in R6/1:

| Clustered PWMs                                                                                             | Logo                                                                                 | P-Value  | ROC AUC |
|------------------------------------------------------------------------------------------------------------|--------------------------------------------------------------------------------------|----------|---------|
| NRSF(M00256), REST(M01256), NRSE(M00325), NRSF(M01028)                                                     |    | 1.26e-05 | 0.55    |
| v-Myb(M00003), c-Myb(M00004), v-Myb(M00227)                                                                |    | 3.57e-05 | 0.55    |
| BEN(M01241), LBP-1(M00644), HEB(M00698)                                                                    |    | 4.75e-04 | 0.54    |
| CEBPE(M01868), C/EBP(M00201)                                                                               |    | 6.48e-04 | 0.54    |
| MIF-1(M00279)                                                                                              |    | 8.75e-04 | 0.53    |
| AP-2alphaA(M01045), AP-2(M00800)                                                                           |    | 1.83e-03 | 0.53    |
| c-Ets-1(M00743), Elk-1(M01163), Elk-1(M01165), SAP1A(M01983), ERF(M01984), ETV3(M01990)                    |    | 2.08e-03 | 0.53    |
| Blimp-1(M01066), IRF-2(M00063), ISGF-3(M00258)                                                             |    | 3.45e-03 | 0.53    |
| SP2(M01783)                                                                                                |   | 3.61e-03 | 0.53    |
| Gfi1(M01067)                                                                                               |  | 4.39e-03 | 0.53    |
| TFIIA(M00707)                                                                                              |  | 4.73e-03 | 0.53    |
| Pax-5(M00143)                                                                                              |  | 4.98e-03 | 0.53    |
| CREB(M00113), CREB(M00177), ATF-1(M01861), ATF-4(M01864), E4F1(M00694)                                     |  | 6.35e-03 | 0.53    |
| v-Maf(M00035), TCF11:MafG(M00284)                                                                          |  | 6.84e-03 | 0.53    |
| Bach2(M00490), AP-1(M00924)                                                                                |  | 8.03e-03 | 0.53    |
| P50:RELA-P65(M01224), NF-kappaB(M00051)                                                                    |  | 8.10e-03 | 0.53    |
| CREB(M00801), AP-1(M00173)                                                                                 |  | 8.84e-03 | 0.52    |
| Max(M00119), c-Myc(M01154), c-Myc:Max(M00118), USF(M00121), MAX(M01830), CLOCK:BMAL(M01116), c-Myc(M01145) |  | 1.03e-02 | 0.52    |
| MTF-1(M00650)                                                                                              |  | 1.14e-02 | 0.52    |
| RNF96(M01199), AP-2gamma(M00470)                                                                           |  | 1.22e-02 | 0.52    |
| NRF-1(M00652), Zfp206(M01742)                                                                              |  | 1.26e-02 | 0.52    |

|                                                           |                                                                                      |          |      |
|-----------------------------------------------------------|--------------------------------------------------------------------------------------|----------|------|
| Pax-6(M00097), Pax-3(M00327)                              |    | 1.30e-02 | 0.52 |
| DEC2(M01843)                                              |    | 1.32e-02 | 0.52 |
| HTF(M00538)                                               |    | 1.38e-02 | 0.52 |
| NeuroD(M01288), AP-4(M00175), AP-4(M00176), AREB6(M00414) |    | 1.45e-02 | 0.52 |
| HEN1(M00058), HEN1(M00068)                                |    | 1.67e-02 | 0.52 |
| TCF11(M00285)                                             |    | 1.67e-02 | 0.52 |
| TGIF(M00418)                                              |    | 1.77e-02 | 0.52 |
| E2F(M00918)                                               |    | 1.81e-02 | 0.52 |
| AML2(M01854)                                              |    | 2.04e-02 | 0.52 |
| COUPTF(M01036)                                            |    | 2.05e-02 | 0.52 |
| Pax-3(M00360), AhR:Arnt(M00237)                           |   | 2.05e-02 | 0.52 |
| CBF(M01080)                                               |  | 2.44e-02 | 0.52 |
| Lhx4(M01421), Lhx8(M01440)                                |  | 2.64e-02 | 0.52 |
| MEF-3(M00319)                                             |  | 2.70e-02 | 0.52 |
| LXRalpha:RXRalpha(M00647)                                 |  | 2.72e-02 | 0.52 |
| PITX1(M01826)                                             |  | 2.97e-02 | 0.52 |
| N-Myc(M00055), Myc(M00799), Ebox(M01034)                  |  | 3.00e-02 | 0.52 |
| FXR/RXR-alpha(M00631)                                     |  | 3.01e-02 | 0.52 |
| TBX22(M01195), TBX15(M01263)                              |  | 3.16e-02 | 0.52 |
| Evi-1(M00011)                                             |  | 3.20e-02 | 0.52 |
| Otx3(M01403), Pitx3(M01343)                               |  | 3.27e-02 | 0.52 |
| CP2/LBP-1c/LSF(M00947)                                    |  | 3.47e-02 | 0.52 |

|                |                                              |          |      |
|----------------|----------------------------------------------|----------|------|
| Barbie(M00238) | <p>M00238</p> <p>bits</p> <p>AAAG</p>        | 3.63e-02 | 0.52 |
| MAZR(M00491)   | <p>M00491</p> <p>bits</p> <p>GG GGGG</p>     | 3.69e-02 | 0.52 |
| Tal-1(M01591)  | <p>M01591</p> <p>bits</p> <p>CT TC</p>       | 4.18e-02 | 0.52 |
| GAF(M01209)    | <p>M01209</p> <p>bits</p> <p>C ATT CCC T</p> | 4.52e-02 | 0.52 |
| Egr(M00807)    | <p>M00807</p> <p>bits</p> <p>GT GGG G</p>    | 4.56e-02 | 0.52 |

Dataset S7

Regression-based motif analysis.

H3K27acetylated sites near down-regulated genes in R6/1:

| Motif_id | beta   | t-stat | pval     | FDR      | Motif_name                                                   | Logo |
|----------|--------|--------|----------|----------|--------------------------------------------------------------|------|
| 5        | 0.0927 | 7.72   | 1.21e-14 | 1.73e-12 | Rela Nfkb1 Nfkb2                                             |      |
| 42       | 0.106  | 7.72   | 1.24e-14 | 1.73e-12 | Nfia Nfic                                                    |      |
| 84       | 0.0911 | 7.66   | 1.96e-14 | 1.73e-12 | Ets1 Ets2 Elf2 Elf1 Elk1 Erg Fli1 Elk4                       |      |
| 18       | 0.0955 | 7.63   | 2.44e-14 | 1.73e-12 | Ikzf1 Ikzf2                                                  |      |
| 138      | 0.0919 | 7.62   | 2.64e-14 | 1.73e-12 | Gtf2i                                                        |      |
| 4        | 0.118  | 7.51   | 6.48e-14 | 3.55e-12 | Rela Rel                                                     |      |
| 141      | 0.0796 | 7.42   | 1.24e-13 | 5.81e-12 | x                                                            |      |
| 108      | 0.0977 | 7.39   | 1.55e-13 | 6.39e-12 | Topors                                                       |      |
| 2        | 0.11   | 7.36   | 1.91e-13 | 7e-12    | Tfap4                                                        |      |
| 129      | 0.146  | 7.24   | 4.58e-13 | 1.3e-11  | Maf                                                          |      |
| 54       | 0.0981 | 7.24   | 4.61e-13 | 1.3e-11  | Egr1 Egr2                                                    |      |
| 117      | 0.0955 | 7.24   | 4.74e-13 | 1.3e-11  | Arnt                                                         |      |
| 7        | 0.119  | 7.18   | 7.36e-13 | 1.86e-11 | x                                                            |      |
| 3        | 0.0933 | 7.16   | 8.67e-13 | 2.04e-11 | Hoxa5                                                        |      |
| 40       | 0.0786 | 7.07   | 1.6e-12  | 3.5e-11  | Tfap4 Tcf12 Neurod1                                          |      |
| 109      | 0.147  | 7.04   | 2.02e-12 | 4.16e-11 | Pitx2                                                        |      |
| 16       | 0.134  | 6.99   | 2.8e-12  | 5.14e-11 | Zfp87                                                        |      |
| 9        | 0.0855 | 6.99   | 2.81e-12 | 5.14e-11 | Tcf7l1 Tal1 Tcf7l2 Zbtb18                                    |      |
| 219      | 0.0727 | 6.97   | 3.2e-12  | 5.3e-11  | Elf1 Spi1                                                    |      |
| 176      | 0.0922 | 6.97   | 3.22e-12 | 5.3e-11  | Runx1 Runx2 Cbfb                                             |      |
| 171      | 0.0888 | 6.94   | 4e-12    | 6.26e-11 | Tcf7l1 Myod1 Myog Arid5b Tcf12 Tcf7l2 Myf6 Myf5 Tal1 Neurod1 |      |

|     |        |      |          |          |                                                                                       |                                                                                       |
|-----|--------|------|----------|----------|---------------------------------------------------------------------------------------|---------------------------------------------------------------------------------------|
| 170 | 0.079  | 6.89 | 5.94e-12 | 8.88e-11 | Etv4 Spi1 Ets1 Ets2<br>Elf1 Elk1 Erg Fli1<br>Gabpa Gabpb1 Elf2<br>Elk3 Elk4 Spib Elf5 |    |
| 157 | 0.0824 | 6.88 | 6.34e-12 | 9.07e-11 | Egr1 Egr2                                                                             |    |
| 142 | 0.104  | 6.87 | 6.77e-12 | 9.28e-11 | Zfp148                                                                                |    |
| 139 | 0.0802 | 6.84 | 8.52e-12 | 1.1e-10  | Gtf2a2                                                                                |    |
| 294 | 0.0635 | 6.83 | 8.71e-12 | 1.1e-10  | Ltf                                                                                   |    |
| 65  | 0.135  | 6.81 | 1.05e-11 | 1.27e-10 | Mafg Nfe2l1 Nrf1                                                                      |   |
| 175 | 0.0892 | 6.78 | 1.23e-11 | 1.45e-10 | Nfe2l2 Bach1 Bach2<br>Maf Mafb Mafg Mafk<br>Nfe2 Nfe2l1 Nrf1 Fosl1                    |  |
| 97  | 0.154  | 6.74 | 1.7e-11  | 1.9e-10  | x                                                                                     |  |
| 122 | 0.0976 | 6.73 | 1.79e-11 | 1.9e-10  | Foxm1                                                                                 |  |
| 58  | 0.0914 | 6.73 | 1.79e-11 | 1.9e-10  | Ebf1                                                                                  |  |
| 86  | 0.412  | 6.7  | 2.12e-11 | 2.18e-10 | Pax3                                                                                  |  |
| 32  | 0.149  | 6.68 | 2.41e-11 | 2.34e-10 | Ahr                                                                                   |  |
| 29  | 0.0962 | 6.68 | 2.45e-11 | 2.34e-10 | Max Usf1 Myc Usf2<br>Srebf1 Arnt Bhlhe40                                              |  |
| 41  | 0.102  | 6.68 | 2.49e-11 | 2.34e-10 | Nr3c1                                                                                 |  |
| 238 | 0.0685 | 6.65 | 3.11e-11 | 2.85e-10 | Ctcf                                                                                  |  |
| 315 | 0.0784 | 6.61 | 3.92e-11 | 3.49e-10 | Bhlhe40 Bhlhe41                                                                       |  |
| 87  | 0.114  | 6.6  | 4.29e-11 | 3.71e-10 | Pax4                                                                                  |  |
| 124 | 0.356  | 6.55 | 6.14e-11 | 5.18e-10 | Gata4                                                                                 |  |
| 39  | 0.0743 | 6.54 | 6.47e-11 | 5.32e-10 | Fos Jun Atf1 Atf2 Atf3<br>Atf4 Atf5 Creb1 Crem                                        |  |
| 11  | 0.14   | 6.53 | 6.74e-11 | 5.4e-10  | Yy1                                                                                   |  |
| 281 | 0.137  | 6.51 | 7.56e-11 | 5.92e-10 | Tgif1 Tgif2 Pknox2<br>Meis1 Pknox1 Meis2                                              |  |

|     |        |      |          |          |                                                                                                                                 |                                                                                       |
|-----|--------|------|----------|----------|---------------------------------------------------------------------------------------------------------------------------------|---------------------------------------------------------------------------------------|
| 143 | 0.0716 | 6.49 | 9.04e-11 | 6.47e-10 | Foxd3 Foxa1 Foxj1<br>Foxf1 Foxf2 Foxh1<br>Foxa2                                                                                 |    |
| 106 | 0.0898 | 6.49 | 9.06e-11 | 6.47e-10 | Foxf2 Foxo1 Foxo4                                                                                                               |    |
| 179 | 0.0705 | 6.48 | 9.18e-11 | 6.47e-10 | Foxp3                                                                                                                           |    |
| 154 | 0.0885 | 6.48 | 9.46e-11 | 6.47e-10 | Hif1a                                                                                                                           |    |
| 189 | 0.0604 | 6.48 | 9.55e-11 | 6.47e-10 | Myod1 Usf1 Usf2 Myc<br>Max Mitf Tfe3 Tfeb<br>Arid5b Bhlhe40<br>Bhlhe41 Tcf711 Nhlh1<br>Tcf12 Tcf712 Myf6 Myf5<br>Myog Mycn Tal1 |    |
| 103 | 0.108  | 6.48 | 9.63e-11 | 6.47e-10 | Pou3f2                                                                                                                          |    |
| 55  | 0.34   | 6.48 | 9.63e-11 | 6.47e-10 | Cebpa                                                                                                                           |    |
| 151 | 0.109  | 6.47 | 1.04e-10 | 6.8e-10  | Nr2f1 Nr2f2 Hnf4a<br>Hnf4g Ppara Ppard<br>Pparg                                                                                 |   |
| 74  | 0.0723 | 6.46 | 1.05e-10 | 6.8e-10  | x                                                                                                                               |  |
| 49  | 0.0857 | 6.43 | 1.35e-10 | 8.53e-10 | Stat1 Stat3                                                                                                                     |  |
| 149 | 0.106  | 6.41 | 1.51e-10 | 9.4e-10  | Srebf1                                                                                                                          |  |
| 153 | 0.0798 | 6.4  | 1.56e-10 | 9.48e-10 | Pou2f1 Pou2af1<br>Pou2f2 Pou5f1 Slc22a3<br>Pou3f1 Pou3f2 Pou4f1                                                                 |  |
| 282 | 0.067  | 6.4  | 1.58e-10 | 9.48e-10 | Zfp263                                                                                                                          |  |
| 47  | 0.103  | 6.4  | 1.61e-10 | 9.48e-10 | Srebf1                                                                                                                          |  |
| 113 | 0.0767 | 6.39 | 1.71e-10 | 9.88e-10 | Nfe2 Bach2 Bach1 Fos<br>Jun Fosb Fosl1 Junb<br>Jund Fosl2 Mafk                                                                  |  |
| 63  | 0.082  | 6.36 | 2.1e-10  | 1.19e-09 | Rfx1                                                                                                                            |  |
| 127 | 0.0658 | 6.35 | 2.18e-10 | 1.21e-09 | Tfcp2 Ubp1                                                                                                                      |  |
| 239 | 0.0718 | 6.35 | 2.21e-10 | 1.21e-09 | Foxa1                                                                                                                           |  |
| 92  | 0.151  | 6.31 | 2.81e-10 | 1.52e-09 | Foxj2                                                                                                                           |  |

|     |        |      |          |          |                             |  |
|-----|--------|------|----------|----------|-----------------------------|--|
| 91  | 0.112  | 6.31 | 2.87e-10 | 1.53e-09 | Hoxa9 Meis1                 |  |
| 162 | 0.171  | 6.3  | 3e-10    | 1.57e-09 | Tcf7l1 Myf6 Myod1 Myog      |  |
| 284 | 0.0599 | 6.29 | 3.27e-10 | 1.68e-09 | Tal1                        |  |
| 14  | 0.0918 | 6.28 | 3.59e-10 | 1.81e-09 | Mecom                       |  |
| 93  | 0.135  | 6.27 | 3.65e-10 | 1.82e-09 | E2f1 E2f3                   |  |
| 102 | 0.217  | 6.25 | 4.17e-10 | 2.04e-09 | Stat5a                      |  |
| 161 | 0.113  | 6.25 | 4.22e-10 | 2.04e-09 | Srf                         |  |
| 115 | 0.0876 | 6.25 | 4.3e-10  | 2.05e-09 | Ppara Pparg                 |  |
| 172 | 0.0762 | 6.24 | 4.63e-10 | 2.18e-09 | Rfx1 Rfx2 Rfx4 Rfxank Rfxap |  |
| 1   | 0.0755 | 6.23 | 4.81e-10 | 2.23e-09 | Myb                         |  |
| 327 | 0.0532 | 6.23 | 4.92e-10 | 2.25e-09 | Lef1 Tcf7                   |  |
| 96  | 0.17   | 6.22 | 5.09e-10 | 2.29e-09 | Vdr Ppara Rxra              |  |
| 80  | 0.425  | 6.2  | 5.7e-10  | 2.54e-09 | Pax6 Pax3                   |  |
| 243 | 0.0578 | 6.16 | 7.55e-10 | 3.31e-09 | Atf5                        |  |
| 22  | 0.0887 | 6.15 | 8.11e-10 | 3.51e-09 | Cux1                        |  |
| 318 | 0.0528 | 6.14 | 8.61e-10 | 3.68e-09 | Cebpg                       |  |
| 155 | 0.178  | 6.09 | 1.17e-09 | 4.92e-09 | Pou1f1                      |  |
| 15  | 0.106  | 6.06 | 1.36e-09 | 5.66e-09 | Zfp87                       |  |
| 123 | 0.106  | 6.06 | 1.42e-09 | 5.83e-09 | Nr1h4                       |  |
| 68  | 0.0651 | 6.01 | 1.88e-09 | 7.63e-09 | Foxi1 Foxf1 Foxp3           |  |
| 17  | 0.083  | 6    | 2.06e-09 | 8.25e-09 | Zbtb6                       |  |
| 264 | 0.139  | 5.99 | 2.17e-09 | 8.61e-09 | Duxbl2                      |  |

|     |        |      |          |          |                                       |                                                                                       |
|-----|--------|------|----------|----------|---------------------------------------|---------------------------------------------------------------------------------------|
| 70  | 0.137  | 5.97 | 2.37e-09 | 9.3e-09  | x                                     |    |
| 107 | 0.0725 | 5.97 | 2.42e-09 | 9.35e-09 | Cdc5l                                 |    |
| 6   | 2.56   | 5.96 | 2.62e-09 | 1e-08    | Nfia Nfib Nfic                        |    |
| 23  | 0.345  | 5.95 | 2.78e-09 | 1.05e-08 | Cux1                                  |    |
| 37  | 0.51   | 5.94 | 2.85e-09 | 1.06e-08 | Nr2f2                                 |    |
| 206 | 0.0663 | 5.94 | 2.86e-09 | 1.06e-08 | Rbpj                                  |    |
| 51  | 0.0648 | 5.94 | 2.92e-09 | 1.07e-08 | Mef2a                                 |    |
| 76  | 0.187  | 5.93 | 3.09e-09 | 1.12e-08 | x                                     |    |
| 178 | 0.19   | 5.93 | 3.12e-09 | 1.12e-08 | Cdx1 Cdx2                             |    |
| 85  | 0.0736 | 5.92 | 3.29e-09 | 1.14e-08 | Gata1 Gata2 Gata3                     |   |
| 94  | 0.145  | 5.92 | 3.3e-09  | 1.14e-08 | Nkx2-1                                |  |
| 56  | 0.0787 | 5.92 | 3.3e-09  | 1.14e-08 | Tbp                                   |  |
| 134 | 0.0855 | 5.91 | 3.53e-09 | 1.21e-08 | x                                     |  |
| 147 | 0.0737 | 5.9  | 3.61e-09 | 1.22e-08 | Pou1f1                                |  |
| 99  | 0.0886 | 5.9  | 3.76e-09 | 1.26e-08 | Cyp19a1                               |  |
| 48  | 0.13   | 5.88 | 4.27e-09 | 1.42e-08 | Tcf7l1                                |  |
| 158 | 0.81   | 5.87 | 4.34e-09 | 1.43e-08 | Pax1 Pax2 Pax3 Pax4<br>Pax5 Pax8 Pax6 |  |
| 64  | 0.0846 | 5.87 | 4.38e-09 | 1.43e-08 | Rfx1                                  |  |
| 25  | 0.0743 | 5.86 | 4.87e-09 | 1.57e-08 | Cebpb Cebpa Cebp<br>Cebpde            |  |
| 150 | 0.134  | 5.85 | 5.06e-09 | 1.62e-08 | Hmga2 Hmga1 Irf4                      |  |
| 126 | 0.0678 | 5.84 | 5.25e-09 | 1.66e-08 | Onecut1 Onecut2                       |  |



|     |        |      |          |          |                                                                                                              |                                                                                       |
|-----|--------|------|----------|----------|--------------------------------------------------------------------------------------------------------------|---------------------------------------------------------------------------------------|
| 272 | 0.0615 | 5.83 | 5.6e-09  | 1.75e-08 | Alx1 Hoxb5 Hoxc8<br>Gsx2 Hoxa3 Hoxd3<br>Hoxa6 Vax1 Hoxa2<br>Pdhx Dlx1 Bsx Meox1<br>Hoxa5 Irf6 Hoxb6<br>Hoxa1 | 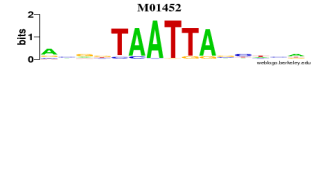   |
| 19  | 0.169  | 5.83 | 5.64e-09 | 1.75e-08 | Cux1                                                                                                         |    |
| 159 | 0.0821 | 5.82 | 6.19e-09 | 1.9e-08  | Tfap2a Tfap2b Tfap2c                                                                                         |    |
| 135 | 0.0881 | 5.81 | 6.23e-09 | 1.9e-08  | x                                                                                                            |    |
| 253 | 0.106  | 5.8  | 6.92e-09 | 2.09e-08 | Pou3f3                                                                                                       |    |
| 160 | 0.0871 | 5.79 | 7.11e-09 | 2.13e-08 | Creb1 Atf2 Jun Atf3<br>Atf4 Crem Atf1 Atf5                                                                   |    |
| 27  | 0.197  | 5.78 | 7.46e-09 | 2.21e-08 | Creb1                                                                                                        |    |
| 144 | 0.0622 | 5.77 | 7.97e-09 | 2.34e-08 | Usf1 Usf2                                                                                                    |   |
| 35  | 0.0746 | 5.76 | 8.51e-09 | 2.48e-08 | Pou3f2                                                                                                       |  |
| 128 | 0.183  | 5.76 | 8.83e-09 | 2.55e-08 | Hnf1b                                                                                                        |  |
| 44  | 0.0825 | 5.75 | 9.28e-09 | 2.65e-08 | x                                                                                                            |  |
| 283 | 0.0673 | 5.74 | 9.85e-09 | 2.79e-08 | Klf4 Klf1                                                                                                    |  |
| 168 | 0.6    | 5.73 | 1.01e-08 | 2.84e-08 | Nr2f1 Nr2f2 Nr1h3<br>Nr1h2 Rara Nr1i2 Rxra<br>Rxb                                                            |  |
| 185 | 0.0536 | 5.71 | 1.16e-08 | 3.24e-08 | Tbx5                                                                                                         |  |
| 52  | 0.118  | 5.71 | 1.18e-08 | 3.27e-08 | Ahr Arnt                                                                                                     |  |
| 104 | 0.0592 | 5.7  | 1.24e-08 | 3.41e-08 | Pou6f1                                                                                                       |  |
| 90  | 0.0703 | 5.68 | 1.38e-08 | 3.75e-08 | Meis1                                                                                                        |  |
| 120 | 0.186  | 5.68 | 1.4e-08  | 3.79e-08 | Cebpg                                                                                                        |  |
| 60  | 0.0646 | 5.67 | 1.43e-08 | 3.82e-08 | Trp53                                                                                                        |  |
| 66  | 0.0851 | 5.63 | 1.82e-08 | 4.83e-08 | Nfe2l1 Nrf1                                                                                                  |  |

|     |        |      |          |          |                                 |                                                                                       |
|-----|--------|------|----------|----------|---------------------------------|---------------------------------------------------------------------------------------|
| 101 | 0.0652 | 5.62 | 1.92e-08 | 5.05e-08 | Arid5b                          |    |
| 316 | 0.0569 | 5.62 | 1.95e-08 | 5.08e-08 | Tfap2b                          |    |
| 34  | 0.929  | 5.59 | 2.27e-08 | 5.89e-08 | Pax5                            |    |
| 163 | 0.0699 | 5.55 | 2.83e-08 | 7.27e-08 | Sp1 Sp3 Zbtb7b Sp4 Zfp148 Klf11 |    |
| 174 | 0.335  | 5.55 | 2.95e-08 | 7.53e-08 | Pax6                            |    |
| 132 | 0.162  | 5.55 | 2.99e-08 | 7.56e-08 | Sp3                             |    |
| 111 | 0.355  | 5.5  | 3.79e-08 | 9.53e-08 | Pparg                           |    |
| 215 | 0.0471 | 5.49 | 4.2e-08  | 1.05e-07 | Nkx2-5 Vsx2 Hoxa4 Bglap2 Arid3a |    |
| 289 | 0.0519 | 5.48 | 4.28e-08 | 1.06e-07 | Trp53                           |    |
| 21  | 0.0608 | 5.46 | 4.72e-08 | 1.15e-07 | Cux1                            |    |
| 262 | 0.15   | 5.46 | 4.73e-08 | 1.15e-07 | Rhox11                          |   |
| 100 | 0.0647 | 5.45 | 5.18e-08 | 1.25e-07 | Nkx3-1                          |  |
| 199 | 0.0498 | 5.42 | 5.98e-08 | 1.44e-07 | Zbtb16                          |  |
| 209 | 0.058  | 5.42 | 6.2e-08  | 1.48e-07 | Pou5f1 Slc22a3                  |  |
| 222 | 0.0627 | 5.41 | 6.38e-08 | 1.51e-07 | Bcl6                            |  |
| 169 | 0.508  | 5.4  | 6.63e-08 | 1.56e-07 | Nr1i2 Rxra Vdr                  |  |
| 211 | 0.0503 | 5.4  | 6.85e-08 | 1.6e-07  | Nr5a1 Nr4a1 Nr4a2 Nr6a1         |  |
| 191 | 0.0543 | 5.36 | 8.5e-08  | 1.97e-07 | Nr2f1 Nr2f2                     |  |
| 217 | 0.0987 | 5.36 | 8.6e-08  | 1.98e-07 | Ikzf1                           |  |
| 166 | 0.222  | 5.34 | 9.23e-08 | 2.11e-07 | Tfcp2                           |  |
| 165 | 0.0569 | 5.34 | 9.52e-08 | 2.16e-07 | Mef2c Mef2d Mef2a               |  |
| 145 | 0.149  | 5.3  | 1.19e-07 | 2.68e-07 | Smad4                           |  |

|     |        |      |          |          |                                                              |  |
|-----|--------|------|----------|----------|--------------------------------------------------------------|--|
| 137 | 0.0495 | 5.29 | 1.21e-07 | 2.71e-07 | Tead1                                                        |  |
| 89  | 0.0633 | 5.29 | 1.25e-07 | 2.79e-07 | Mef2a                                                        |  |
| 274 | 0.123  | 5.26 | 1.44e-07 | 3.17e-07 | Cdx2 Hoxa9 Cdx1<br>Hoxd10 Hoxc9 Hoxb9<br>Hoxd11 Hoxb8 Hoxa10 |  |
| 248 | 0.0528 | 5.25 | 1.51e-07 | 3.31e-07 | Zfp217                                                       |  |
| 266 | 0.146  | 5.25 | 1.57e-07 | 3.41e-07 | Hoxd13                                                       |  |
| 265 | 0.0582 | 5.24 | 1.62e-07 | 3.5e-07  | Dlx3 Dlx2 Dlx4                                               |  |
| 301 | 0.0538 | 5.24 | 1.66e-07 | 3.56e-07 | Nr1h3 Nr1h2 Rorb Thra                                        |  |
| 20  | 0.164  | 5.24 | 1.66e-07 | 3.56e-07 | Pbx1                                                         |  |
| 112 | 0.0759 | 5.22 | 1.81e-07 | 3.83e-07 | E2f1 Tfdp1 E2f3 E2f7                                         |  |
| 302 | 0.0494 | 5.2  | 2.01e-07 | 4.24e-07 | x                                                            |  |
| 121 | 0.211  | 5.19 | 2.08e-07 | 4.36e-07 | Rfx1                                                         |  |
| 254 | 0.151  | 5.19 | 2.11e-07 | 4.4e-07  | Hoxc11 Hoxc10<br>Hoxc12                                      |  |
| 329 | 0.0546 | 5.19 | 2.13e-07 | 4.41e-07 | Pbx1                                                         |  |
| 236 | 0.0783 | 5.19 | 2.14e-07 | 4.41e-07 | Pdpx Hoxd9                                                   |  |
| 59  | 0.0742 | 5.16 | 2.48e-07 | 5.08e-07 | Zfp143                                                       |  |
| 31  | 0.154  | 5.16 | 2.56e-07 | 5.2e-07  | Pou3f1                                                       |  |
| 257 | 0.44   | 5.14 | 2.81e-07 | 5.66e-07 | Nkx2-1 Nkx2-6 Nkx2-4<br>Nkx2-2 Nkx2-5 Nkx3-2                 |  |
| 38  | 0.0645 | 5.14 | 2.82e-07 | 5.66e-07 | Pou2f1                                                       |  |
| 218 | 0.0491 | 5.11 | 3.27e-07 | 6.53e-07 | Bcl6                                                         |  |
| 297 | 0.0441 | 5.1  | 3.37e-07 | 6.65e-07 | Gli1 Gli2 Gli3                                               |  |
| 194 | 0.0501 | 5.1  | 3.38e-07 | 6.65e-07 | Tfap2a Tfap2b Tfap2c                                         |  |
| 309 | 0.0471 | 5.1  | 3.45e-07 | 6.75e-07 | Gata5                                                        |  |

|     |        |      |          |          |                                                                               |                                                                                       |
|-----|--------|------|----------|----------|-------------------------------------------------------------------------------|---------------------------------------------------------------------------------------|
| 267 | 0.0998 | 5.1  | 3.48e-07 | 6.77e-07 | Hmx2 Hmx3                                                                     |    |
| 33  | 0.397  | 5.07 | 3.93e-07 | 7.6e-07  | Pax5                                                                          |    |
| 279 | 0.0523 | 5.07 | 4.06e-07 | 7.82e-07 | Pou6f1                                                                        |    |
| 311 | 0.0485 | 5.04 | 4.78e-07 | 9.14e-07 | Runx3                                                                         |    |
| 252 | 0.14   | 5.04 | 4.82e-07 | 9.18e-07 | Hoxc13 Hoxa13                                                                 |    |
| 249 | 0.259  | 5    | 5.85e-07 | 1.11e-06 | Sox5 Sry Sox9 Sox2 Sox4                                                       |    |
| 207 | 0.0515 | 5    | 5.93e-07 | 1.11e-06 | Zbtb33                                                                        |    |
| 205 | 0.0414 | 4.98 | 6.34e-07 | 1.18e-06 | x                                                                             |    |
| 328 | 0.0405 | 4.98 | 6.34e-07 | 1.18e-06 | Mef2c Mef2d                                                                   |    |
| 110 | 0.105  | 4.97 | 6.82e-07 | 1.26e-06 | Glis3                                                                         |   |
| 133 | 0.0498 | 4.94 | 7.74e-07 | 1.42e-06 | Tef                                                                           |  |
| 280 | 0.112  | 4.93 | 8.15e-07 | 1.49e-06 | Irx3 Irx6 Irx2 Irx4 Irx5                                                      |  |
| 197 | 0.048  | 4.91 | 9.18e-07 | 1.67e-06 | Maf                                                                           |  |
| 255 | 0.071  | 4.9  | 9.8e-07  | 1.77e-06 | Prrx2 Nkx6-1 Barhl1 Msx3 En1 Barhl2 Hmx1                                      |  |
| 228 | 0.0494 | 4.89 | 9.97e-07 | 1.79e-06 | Satb1                                                                         |  |
| 130 | 0.126  | 4.88 | 1.05e-06 | 1.88e-06 | Mtf1                                                                          |  |
| 321 | 0.0439 | 4.87 | 1.15e-06 | 2.04e-06 | Smad3 Smad1 Smad2 Smad4                                                       |  |
| 30  | 0.0791 | 4.87 | 1.15e-06 | 2.04e-06 | Gata1 Gata2 Gata3 Lmo2                                                        |  |
| 286 | 0.044  | 4.83 | 1.35e-06 | 2.38e-06 | Sox5 Sox2 Sox10 Sox13 Sox15 Sox18 Sox4 Sox6 Sox9 Sry Nanog Smad1 Tcf711 Nr2e3 |  |
| 259 | 0.0884 | 4.83 | 1.39e-06 | 2.43e-06 | Nkx6-2 Pou2f1 Dbx2 Pax6 Hlx Pou4f3 Shox2 Nkx6-1 Nkx6-3                        |  |

|     |        |      |          |          |                                                                                                                      |                                                                                       |
|-----|--------|------|----------|----------|----------------------------------------------------------------------------------------------------------------------|---------------------------------------------------------------------------------------|
| 271 | 0.1    | 4.81 | 1.53e-06 | 2.67e-06 | Isl2 Barx1 Mnx1 Dlx5<br>Hoxa7 Hoxb7 Msx1<br>Barx2 Hoxd8                                                              |    |
| 310 | 0.0442 | 4.81 | 1.55e-06 | 2.69e-06 | Esr1                                                                                                                 |    |
| 299 | 0.0435 | 4.8  | 1.63e-06 | 2.8e-06  | Ikzf2 Nfatc2 Nfatc1<br>Nr2c2 Nfatc3                                                                                  |    |
| 273 | 0.082  | 4.8  | 1.63e-06 | 2.8e-06  | Lhx2 Vax2 Isx Gbx1<br>Gbx2 Rax Msx2 Lbx2<br>Nkx1-2 Rhox6 Bglap2<br>En2                                               |    |
| 26  | 0.0902 | 4.79 | 1.65e-06 | 2.81e-06 | Creb1                                                                                                                |    |
| 77  | 0.0655 | 4.78 | 1.78e-06 | 3.02e-06 | x                                                                                                                    |    |
| 275 | 0.126  | 4.78 | 1.8e-06  | 3.04e-06 | Gsc Pitx1                                                                                                            |    |
| 250 | 0.136  | 4.75 | 2.03e-06 | 3.41e-06 | Six1 Six6 Six3 Six4<br>Six2                                                                                          |    |
| 69  | 0.0972 | 4.75 | 2.05e-06 | 3.42e-06 | Nfatc2 Nfatc3 Nfatc4                                                                                                 |   |
| 8   | 0.0677 | 4.74 | 2.16e-06 | 3.58e-06 | Irf1                                                                                                                 |  |
| 256 | 0.0493 | 4.73 | 2.24e-06 | 3.71e-06 | Cux1                                                                                                                 |  |
| 312 | 0.0426 | 4.71 | 2.49e-06 | 4.09e-06 | Tead1                                                                                                                |  |
| 270 | 0.12   | 4.71 | 2.5e-06  | 4.09e-06 | Homez                                                                                                                |  |
| 183 | 0.0454 | 4.69 | 2.73e-06 | 4.44e-06 | Hnf1a Hnf1b                                                                                                          |  |
| 277 | 0.127  | 4.67 | 2.98e-06 | 4.82e-06 | Pdpx Evx2 Lhx4 Lhx8<br>Hoxd1 Emx2 Evx1                                                                               |  |
| 220 | 0.0501 | 4.66 | 3.19e-06 | 5.14e-06 | Srebf1 Srebf2                                                                                                        |  |
| 269 | 0.0448 | 4.66 | 3.24e-06 | 5.2e-06  | Hnf1a Hnf1b Hmbox1                                                                                                   |  |
| 62  | 0.161  | 4.65 | 3.3e-06  | 5.26e-06 | Tcf7l1 Lmo2 Zeb1<br>Atoh1                                                                                            |  |
| 88  | 0.0748 | 4.62 | 3.9e-06  | 6.19e-06 | Mef2a                                                                                                                |  |
| 268 | 0.0733 | 4.62 | 3.95e-06 | 6.24e-06 | Otp Vsx1 Hoxa7 Lhx5<br>Phox2b Lmx1b Lhx9<br>Hoxc4 Hoxa4 Hoxc6<br>Lmx1a Alx4 Tlx2 Hoxc5<br>Uncx Lhx3 Pou3f2<br>Nkx6-1 |  |

|     |        |      |          |          |                                    |                                                                                       |
|-----|--------|------|----------|----------|------------------------------------|---------------------------------------------------------------------------------------|
| 148 | 0.0538 | 4.58 | 4.68e-06 | 7.36e-06 | Nkx2-5 Irf1                        |    |
| 230 | 0.0972 | 4.55 | 5.5e-06  | 8.61e-06 | Gtf2ird1                           |    |
| 164 | 0.101  | 4.54 | 5.58e-06 | 8.69e-06 | E2f1                               |    |
| 226 | 0.0377 | 4.51 | 6.5e-06  | 1.01e-05 | Foxo4 Foxo3 Foxo1                  |    |
| 295 | 0.0428 | 4.46 | 8.17e-06 | 1.26e-05 | Yy2 Zfp42                          |    |
| 234 | 0.0517 | 4.44 | 9.27e-06 | 1.42e-05 | Zeb1                               |    |
| 247 | 0.0494 | 4.39 | 1.12e-05 | 1.71e-05 | Myod1 Myf5 Myog Myf6               |    |
| 291 | 0.0504 | 4.39 | 1.15e-05 | 1.75e-05 | Tbp Cdx2                           |    |
| 263 | 0.0643 | 4.37 | 1.23e-05 | 1.87e-05 | Otx1 Otx2 Dmbx1 Crx Pitx2          |    |
| 251 | 0.082  | 4.37 | 1.26e-05 | 1.91e-05 | Lhx3 Pou3f1 Pou1f1 Pou3f4          |    |
| 78  | 0.0542 | 4.35 | 1.37e-05 | 2.06e-05 | Mycn Myc Max Hes1                  |   |
| 260 | 0.0502 | 4.32 | 1.57e-05 | 2.34e-05 | Pou2f1 Pou2f2 Pou3f2 Pou2f3        |  |
| 290 | 0.0366 | 4.32 | 1.58e-05 | 2.36e-05 | Runx1 Runx2                        |  |
| 293 | 0.0388 | 4.32 | 1.59e-05 | 2.36e-05 | Irf8                               |  |
| 223 | 0.0466 | 4.3  | 1.72e-05 | 2.54e-05 | Cyp19a1                            |  |
| 146 | 0.0587 | 4.3  | 1.75e-05 | 2.57e-05 | Zfp384                             |  |
| 233 | 0.0438 | 4.28 | 1.89e-05 | 2.76e-05 | Rora Nr5a2 Nr0b1 Esrrb Nr2c2 Esrra |  |
| 28  | 0.0725 | 4.24 | 2.22e-05 | 3.24e-05 | Myc Max                            |  |
| 187 | 0.0489 | 4.23 | 2.38e-05 | 3.45e-05 | Hsf1 Hsf2                          |  |
| 287 | 0.0466 | 4.22 | 2.51e-05 | 3.62e-05 | Maz Wt1                            |  |
| 13  | 0.0332 | 4.21 | 2.58e-05 | 3.71e-05 | Mecom                              |  |
| 298 | 0.0493 | 4.19 | 2.84e-05 | 4.06e-05 | Klf15                              |  |

|     |        |      |          |          |                                                       |                                                                                       |
|-----|--------|------|----------|----------|-------------------------------------------------------|---------------------------------------------------------------------------------------|
| 190 | 0.0468 | 4.18 | 2.87e-05 | 4.09e-05 | Yy1 Zfp42                                             |    |
| 214 | 0.035  | 4.18 | 2.88e-05 | 4.09e-05 | Dmrt1 Dmrtc2                                          |    |
| 136 | 0.0479 | 4.18 | 2.95e-05 | 4.17e-05 | Tead2                                                 |    |
| 261 | 0.118  | 4.09 | 4.28e-05 | 6.01e-05 | Nkx2-2 Nkx2-9 Nkx3-1 Nkx2-3                           |    |
| 140 | 0.092  | 4.08 | 4.61e-05 | 6.46e-05 | x                                                     |    |
| 276 | 0.0681 | 4.07 | 4.78e-05 | 6.67e-05 | Lhx6 Pax7 Prrx1 Alx3 Alx1 Prrx2 Pax4 Uba2 Phox2a Esx1 |    |
| 125 | 0.0761 | 4.05 | 5.17e-05 | 7.18e-05 | Gcm1 Gcm2                                             |    |
| 188 | 0.039  | 4.04 | 5.36e-05 | 7.41e-05 | Hnf4a Nr2f1 Nr2f6                                     |    |
| 292 | 0.0377 | 3.96 | 7.66e-05 | 0.000105 | Hbp1                                                  |    |
| 324 | 0.0379 | 3.94 | 8.04e-05 | 0.00011  | Elk1 Ets1 Elf3 Ehf Elf1 Elf4 Elf5 Etv6 Spic           |   |
| 118 | 0.057  | 3.92 | 8.87e-05 | 0.000121 | Zfhx3                                                 |  |
| 213 | 0.0329 | 3.89 | 9.96e-05 | 0.000135 | Dmrt2 Dmrt3 Dmrta1 Dmrta2                             |  |
| 131 | 0.105  | 3.88 | 0.000105 | 0.000142 | x                                                     |  |
| 216 | 0.0387 | 3.87 | 0.000109 | 0.000147 | Elk1                                                  |  |
| 72  | 0.094  | 3.83 | 0.000129 | 0.000174 | x                                                     |  |
| 67  | 0.101  | 3.82 | 0.000135 | 0.00018  | Nfya Nfyb Nfyc                                        |  |
| 278 | 0.101  | 3.79 | 0.000152 | 0.000202 | Cphx1                                                 |  |
| 50  | 0.0737 | 3.78 | 0.000157 | 0.000208 | Atf2 Nfil3 Tef Hlf                                    |  |
| 98  | 0.0736 | 3.77 | 0.000162 | 0.000215 | Spz1                                                  |  |
| 208 | 0.0924 | 3.71 | 0.000204 | 0.000269 | Nanog                                                 |  |
| 242 | 0.0291 | 3.71 | 0.000206 | 0.00027  | Hoxa13                                                |  |
| 288 | 0.035  | 3.7  | 0.000215 | 0.000281 | Zbed6                                                 |  |

|     |        |      |          |          |                                                                                                        |                                                                                       |
|-----|--------|------|----------|----------|--------------------------------------------------------------------------------------------------------|---------------------------------------------------------------------------------------|
| 192 | 0.0368 | 3.68 | 0.000238 | 0.000309 | Gli1 Gli2 Gli3 Glis1                                                                                   |    |
| 186 | 0.056  | 3.64 | 0.000272 | 0.000352 | Tcf7l2 Lef1 Tcf7 Sox9                                                                                  |    |
| 116 | 0.0636 | 3.63 | 0.000279 | 0.00036  | Xbp1                                                                                                   |    |
| 12  | 0.0704 | 3.53 | 0.000409 | 0.000526 | Zeb1                                                                                                   |    |
| 325 | 0.0354 | 3.5  | 0.000468 | 0.000599 | Ets1 Gabpa Gabpb1<br>Elk4 Elf2 Elk1 Elk3 Erf<br>Erg Etv1 Etv2 Ets2<br>Etv3 Etv4 Etv5 Fev Fli1<br>Spdef |    |
| 210 | 0.0432 | 3.47 | 0.000526 | 0.00067  | Isl1                                                                                                   |    |
| 53  | 0.129  | 3.45 | 0.000564 | 0.000716 | x                                                                                                      |    |
| 193 | 0.0295 | 3.41 | 0.000643 | 0.000814 | Nkx2-5                                                                                                 |    |
| 152 | 0.0842 | 3.41 | 0.000657 | 0.000828 | Nr1h4 Rxra                                                                                             |    |
| 237 | 0.0357 | 3.39 | 0.000692 | 0.000868 | Rest                                                                                                   |    |
| 195 | 0.0766 | 3.37 | 0.000752 | 0.000941 | Gata1 Gfi1 Gfi1b                                                                                       |   |
| 200 | 0.0317 | 3.36 | 0.000788 | 0.000982 | Runx1                                                                                                  |  |
| 305 | 0.0379 | 3.35 | 0.000819 | 0.00102  | Pou2f1                                                                                                 |  |
| 184 | 0.0717 | 3.27 | 0.00107  | 0.00132  | Foxa2 Foxc1 Foxj2<br>Foxa3 Foxa1                                                                       |  |
| 308 | 0.0454 | 3.25 | 0.00117  | 0.00144  | Brf1 Bdp1 Polr3a                                                                                       |  |
| 196 | 1.53   | 3.19 | 0.00145  | 0.00177  | Gzf1                                                                                                   |  |
| 307 | 0.32   | 3.06 | 0.00223  | 0.00272  | Pparg                                                                                                  |  |
| 204 | 0.0617 | 3.04 | 0.0024   | 0.00292  | Hoxa7                                                                                                  |  |
| 156 | 0.0336 | 3.04 | 0.0024   | 0.00292  | E2f1 Tfdp1 E2f3                                                                                        |  |
| 43  | 0.387  | 2.94 | 0.00332  | 0.00401  | x                                                                                                      |  |
| 231 | 0.0473 | 2.88 | 0.00398  | 0.00479  | Mtf1                                                                                                   |  |



|     |        |       |         |         |                                                  |  |
|-----|--------|-------|---------|---------|--------------------------------------------------|--|
| 306 | 0.0426 | 2.81  | 0.00502 | 0.00603 | Plag1                                            |  |
| 323 | 0.0212 | 2.77  | 0.00561 | 0.00672 | Foxo1                                            |  |
| 202 | 0.0355 | 2.76  | 0.00578 | 0.00689 | Zbtb7a                                           |  |
| 235 | 0.0238 | 2.57  | 0.0101  | 0.0119  | Cnot3                                            |  |
| 225 | 0.0314 | 2.55  | 0.0108  | 0.0128  | Elk1 Fli1                                        |  |
| 203 | 0.123  | 2.51  | 0.0121  | 0.0143  | x                                                |  |
| 313 | 0.0595 | 2.31  | 0.0208  | 0.0245  | Stat1 Stat3 Stat4<br>Stat5a Stat5b Stat6         |  |
| 227 | 0.0972 | 2.3   | 0.0215  | 0.0251  | Stat3                                            |  |
| 114 | 0.0474 | 2.24  | 0.0248  | 0.029   | Nr6a1                                            |  |
| 245 | 0.0331 | 2.23  | 0.0261  | 0.0303  | Mecp2                                            |  |
| 177 | 0.0173 | 2.2   | 0.0277  | 0.032   | Foxp1                                            |  |
| 314 | 0.0352 | 2.02  | 0.0429  | 0.0496  | Crx Rax Otx1 Otx2<br>Gtf2ird1 Pitx3 Pitx1        |  |
| 246 | 0.0395 | 1.94  | 0.0527  | 0.0606  | Hmga2                                            |  |
| 317 | 0.0341 | 1.92  | 0.0549  | 0.0629  | Creb1 Atf1 Crem                                  |  |
| 182 | 0.0313 | 1.88  | 0.0602  | 0.0688  | Hes1                                             |  |
| 212 | 0.0362 | 1.83  | 0.0678  | 0.0772  | Rora                                             |  |
| 258 | 0.0259 | 1.79  | 0.0742  | 0.0841  | Pbx1 Pbx2 Pbx3                                   |  |
| 71  | 0.279  | 1.67  | 0.0951  | 0.107   | x                                                |  |
| 173 | 0.0305 | 1.66  | 0.0968  | 0.109   | Ahr Ahrr Arnt Hif1a<br>Epas1                     |  |
| 320 | 0.0468 | 1.64  | 0.1     | 0.113   | Irf7 Irf8 Irf1 Irf2 Irf3 Irf5<br>Irf4 Irf9 Prdm1 |  |
| 319 | 0.0364 | 1.54  | 0.124   | 0.139   | Ebf1 Ebf3                                        |  |
| 201 | -0.108 | -1.51 | 0.132   | 0.147   | Zfp628                                           |  |

|     |        |        |       |       |                                                   |                                                                                       |
|-----|--------|--------|-------|-------|---------------------------------------------------|---------------------------------------------------------------------------------------|
| 82  | 0.0583 | 1.44   | 0.149 | 0.166 | Ahr                                               |    |
| 83  | 0.0526 | 1.44   | 0.151 | 0.167 | x                                                 |    |
| 300 | 0.0435 | 1.42   | 0.154 | 0.17  | Satb1                                             |    |
| 45  | 0.26   | 1.18   | 0.24  | 0.264 | x                                                 |    |
| 326 | 0.426  | 1.17   | 0.243 | 0.266 | Mecom                                             |    |
| 221 | 0.068  | 1.13   | 0.258 | 0.282 | Hinfp                                             |    |
| 198 | -0.085 | -1.13  | 0.26  | 0.284 | Hic1                                              |    |
| 244 | 0.0486 | 1.07   | 0.283 | 0.307 | Mecp2                                             |    |
| 81  | 0.126  | 1.01   | 0.313 | 0.339 | x                                                 |    |
| 105 | 1.55   | 0.935  | 0.35  | 0.377 | Zfp423                                            |   |
| 10  | 0.0519 | 0.915  | 0.36  | 0.387 | Nhlh1                                             |  |
| 95  | 0.109  | 0.899  | 0.368 | 0.395 | Hmx3                                              |  |
| 61  | 0.131  | 0.884  | 0.377 | 0.402 | x                                                 |  |
| 322 | 0.016  | 0.869  | 0.385 | 0.41  | Stat5b Stat1 Stat3<br>Stat4 Stat5a Stat6<br>Parp1 |  |
| 75  | 0.0264 | 0.786  | 0.432 | 0.458 | x                                                 |  |
| 24  | 0.0927 | 0.78   | 0.436 | 0.461 | x                                                 |  |
| 57  | 0.204  | 0.74   | 0.46  | 0.484 | Rreb1                                             |  |
| 180 | 0.0233 | 0.738  | 0.46  | 0.484 | Aire                                              |  |
| 285 | 0.0187 | 0.726  | 0.468 | 0.49  | Zfx                                               |  |
| 73  | 0.0924 | 0.692  | 0.489 | 0.511 | x                                                 |  |
| 304 | 0.014  | 0.607  | 0.544 | 0.566 | x                                                 |  |
| 167 | -0.355 | -0.569 | 0.569 | 0.591 | Cyp19a1                                           |  |

|     |           |         |       |       |                   |                                                                                       |
|-----|-----------|---------|-------|-------|-------------------|---------------------------------------------------------------------------------------|
| 296 | 0.0355    | 0.522   | 0.602 | 0.623 | Zfp42             |    |
| 224 | -0.0325   | -0.327  | 0.744 | 0.767 | Vdr Rxra          |    |
| 119 | -0.0808   | -0.221  | 0.825 | 0.848 | Alx4              |    |
| 232 | -0.0111   | -0.191  | 0.848 | 0.869 | Mterf             |    |
| 36  | -0.0355   | -0.174  | 0.862 | 0.881 | T                 |    |
| 303 | -0.00263  | -0.0991 | 0.921 | 0.938 | Nrf1              |    |
| 181 | -0.000856 | 0.0525  | 0.958 | 0.973 | nse5              |    |
| 46  | 0.00305   | 0.0316  | 0.975 | 0.987 | x                 |    |
| 79  | -Inf      | NaN     | NaN   | NaN   | Pax1              |    |
| 229 | -Inf      | NaN     | NaN   | NaN   | Terf1             |    |
| 240 | -Inf      | NaN     | NaN   | NaN   | Tbx22 Tbx18 Tbx15 |   |
| 241 | -Inf      | NaN     | NaN   | NaN   | Tbx15             |  |

## Dataset S7

## TRANSFAC MOTIFS

In lower H3K27acetylated sites in CHL2:

| Clustered PWMs                                                                                                                       | Logo                                                                                 | P-Value  | ROC AUC |
|--------------------------------------------------------------------------------------------------------------------------------------|--------------------------------------------------------------------------------------|----------|---------|
| Octamer(M01324)                                                                                                                      |    | 1.08e-04 | 0.54    |
| HSF2(M01244)                                                                                                                         |    | 3.91e-03 | 0.53    |
| c-ets-1(M01986), Pet-1(M02037), Fli-1(M02038), GABPalpha(M02039), ER81(M01987), ERG(M01985), ER71(M01988), Ets2(M01989), Erm(M01992) |    | 5.13e-03 | 0.53    |
| Oct-2(M01761), Oct-1(M00136)                                                                                                         |    | 5.47e-03 | 0.53    |
| POU3F2(M00464), OCT-x(M00210), Oct-1(M00161), Oct-2(M01368), POU2F3(M01476)                                                          |    | 6.42e-03 | 0.53    |
| c-Myc:Max(M00123)                                                                                                                    |    | 6.79e-03 | 0.53    |
| RFX(M00975)                                                                                                                          |    | 9.21e-03 | 0.52    |
| AP-1(M00517), Bach1(M00495)                                                                                                          |    | 1.01e-02 | 0.52    |
| TBX22(M01195)                                                                                                                        |   | 1.06e-02 | 0.52    |
| Pit-1(M00802)                                                                                                                        |  | 1.08e-02 | 0.52    |
| PTF1-beta(M00657)                                                                                                                    |  | 1.27e-02 | 0.52    |
| AP-1(M00199), FRA1(M01267), AP-1(M00174), AP-1(M00173)                                                                               |  | 1.44e-02 | 0.52    |
| Ets(M00771), c-Ets-1(M00339), c-Ets-2(M00340)                                                                                        |  | 1.47e-02 | 0.52    |
| C/EBPdelta(M00621)                                                                                                                   |  | 1.59e-02 | 0.52    |
| RSRFC4(M00026), MEF-2(M00232), RSRFC4(M00407)                                                                                        |  | 1.67e-02 | 0.52    |
| Tal-1(M01591)                                                                                                                        |  | 1.71e-02 | 0.52    |
| PU.1(M00658)                                                                                                                         |  | 1.77e-02 | 0.52    |
| Oct-1(M00138)                                                                                                                        |  | 1.80e-02 | 0.52    |
| MEF-2(M00006)                                                                                                                        |  | 2.16e-02 | 0.52    |
| FOXP3(M00992)                                                                                                                        |  | 2.26e-02 | 0.52    |

|                               |                                                                                      |          |      |
|-------------------------------|--------------------------------------------------------------------------------------|----------|------|
| ZABC1(M01306)                 |    | 2.64e-02 | 0.52 |
| Staf(M00262)                  |    | 2.81e-02 | 0.52 |
| HOXA10(M01464), Cdx-1(M01373) |    | 3.22e-02 | 0.52 |
| ICSBP(M00699)                 |    | 3.38e-02 | 0.52 |
| c-Maf(M01070)                 |    | 3.64e-02 | 0.52 |
| NRSE(M00325)                  |    | 3.65e-02 | 0.52 |
| Poly(M00211)                  |    | 3.83e-02 | 0.52 |
| Meis2(M01488), Meis1(M01419)  |    | 4.10e-02 | 0.52 |
| v-Myb(M00003)                 |    | 4.13e-02 | 0.52 |
| GR(M00205)                    |   | 4.40e-02 | 0.52 |
| C/EBPgamma(M00622)            |  | 4.46e-02 | 0.52 |
| MEF-2D(M02026)                |  | 4.55e-02 | 0.52 |
| Evi-1(M00078)                 |  | 4.62e-02 | 0.52 |
| MyoD(M00184)                  |  | 4.75e-02 | 0.52 |
| E2F6(M01252)                  |  | 4.93e-02 | 0.52 |
| IRF-1(M00747)                 |  | 4.99e-02 | 0.52 |

## Dataset S7

## TRANSFAC MOTIFS

In higher H3K27acetylated sites in R6/1:

| Clustered PWMs                                                                                                                                                                                                                                                                                        | Logo                                                                                 | P-Value  | ROC AUC |
|-------------------------------------------------------------------------------------------------------------------------------------------------------------------------------------------------------------------------------------------------------------------------------------------------------|--------------------------------------------------------------------------------------|----------|---------|
| Oct-1(M00162), Oct-1(M00195), Oct-1(M00930)                                                                                                                                                                                                                                                           |    | 1.25e-05 | 0.55    |
| TCF11(M00285), REX1(M01695)                                                                                                                                                                                                                                                                           |    | 7.36e-05 | 0.54    |
| ATF-4(M01864), v-Jun(M00036), ATF2:c-Jun(M00041), E4F1(M00694), ATF-2(M01862), ATF-3(M01863), CREB(M00916), CREB(M00981)                                                                                                                                                                              |    | 1.09e-04 | 0.54    |
| Oct-1(M00161), Oct-1(M00135), OCT-x(M00210), Oct-1(M00248), Oct-1(M00342)                                                                                                                                                                                                                             |    | 1.17e-04 | 0.54    |
| CEBPE(M01868), C/EBP(M00201)                                                                                                                                                                                                                                                                          |    | 3.83e-04 | 0.54    |
| Nrf-2(M00821)                                                                                                                                                                                                                                                                                         |    | 4.76e-04 | 0.54    |
| v-Myb(M00003), v-Myb(M00227)                                                                                                                                                                                                                                                                          |    | 5.02e-04 | 0.54    |
| CREB(M00801), FRA1(M01267), AP-1(M00174)                                                                                                                                                                                                                                                              |    | 8.24e-04 | 0.53    |
| Hdx(M01333), CDP(M01344)                                                                                                                                                                                                                                                                              |   | 1.14e-03 | 0.53    |
| HB9(M01349), Vax-2(M01327), HOXB3(M01330), HOXB7(M01396), Evx-1(M01475)                                                                                                                                                                                                                               |  | 1.65e-03 | 0.53    |
| Cart-1(M00416), HoxB5(M01319), GSH2(M01326), HOXA3(M01337), HOXD3(M01338), Barx1(M01340), dlx5(M01388), HOXA6(M01392), Vax-1(M01397), dlx3(M01400), HoxA2(M01402), ipf1(M01438), Dlx-1(M01439), Mox1(M01443), HOXD1(M01448), HOXA5(M01452), HOXB6(M01460), Dlx-2(M01468), Dlx7(M01486), HOXA1(M01487) |  | 2.11e-03 | 0.53    |
| NeuroD(M01288)                                                                                                                                                                                                                                                                                        |  | 2.13e-03 | 0.53    |
| LEF1(M01022), TCF-4(M00671)                                                                                                                                                                                                                                                                           |  | 2.19e-03 | 0.53    |
| APOLYA(M00310)                                                                                                                                                                                                                                                                                        |  | 2.22e-03 | 0.53    |
| TGIF1(M01346), MRG2(M01395), TGIF2(M01407), Meis1(M01419), PREP1(M01459), TGIF(M00418)                                                                                                                                                                                                                |  | 2.51e-03 | 0.53    |
| Evi-1(M00079), Evi-1(M02002)                                                                                                                                                                                                                                                                          |  | 3.57e-03 | 0.53    |
| Pbx(M01967)                                                                                                                                                                                                                                                                                           |  | 3.84e-03 | 0.53    |
| IPF1(M01234), IPF1(M01233), IPF1(M01235), ISL1(M01127)                                                                                                                                                                                                                                                |  | 4.82e-03 | 0.53    |

|                                                  |                                                                                      |          |      |
|--------------------------------------------------|--------------------------------------------------------------------------------------|----------|------|
| Oct-1(M00136)                                    |    | 5.66e-03 | 0.53 |
| C/EBPgamma(M01869)                               |    | 8.23e-03 | 0.53 |
| KAISO(M01119)                                    |    | 9.38e-03 | 0.52 |
| FOXJ2(M00423)                                    |    | 1.03e-02 | 0.52 |
| Octamer(M01324)                                  |    | 1.09e-02 | 0.52 |
| alpha-CP1(M00687)                                |    | 1.14e-02 | 0.52 |
| FOXP3(M00992)                                    |    | 1.17e-02 | 0.52 |
| TCF-4(M02033)                                    |    | 1.28e-02 | 0.52 |
| Barx-2(M01431)                                   |    | 1.51e-02 | 0.52 |
| Lhx4(M01421)                                     |   | 1.76e-02 | 0.52 |
| TCF11:MafG(M00284), v-Maf(M00035), c-Maf(M01070) |  | 1.91e-02 | 0.52 |
| HLF(M00260)                                      |  | 2.03e-02 | 0.52 |
| RORalpha2(M00157), RORalpha(M01138)              |  | 2.10e-02 | 0.52 |
| Rhox11(M01384)                                   |  | 2.40e-02 | 0.52 |
| GZF1(M01069)                                     |  | 2.47e-02 | 0.52 |
| C/EBPgamma(M00622)                               |  | 2.56e-02 | 0.52 |
| SOX(M01014)                                      |  | 2.65e-02 | 0.52 |
| HMGA2(M01300)                                    |  | 2.66e-02 | 0.52 |
| IPF1(M01013)                                     |  | 2.67e-02 | 0.52 |
| HOXA7(M01336), HOXC5(M01454)                     |  | 2.68e-02 | 0.52 |
| HNF1(M00206)                                     |  | 3.07e-02 | 0.52 |
| CHX10(M00437)                                    |  | 3.11e-02 | 0.52 |

|                |                                                                                      |          |      |
|----------------|--------------------------------------------------------------------------------------|----------|------|
| Zec(M01081)    |    | 3.17e-02 | 0.52 |
| NF-AT2(M01718) |    | 3.19e-02 | 0.52 |
| NFAT3(M01734)  |    | 3.42e-02 | 0.52 |
| Pbx1(M01357)   |    | 3.61e-02 | 0.52 |
| DEC(M00997)    |    | 3.67e-02 | 0.52 |
| Hmbox1(M01456) |    | 3.74e-02 | 0.52 |
| PPAR(M00528)   |    | 3.76e-02 | 0.52 |
| PEA3(M00655)   |    | 4.29e-02 | 0.52 |
| IRF-2(M00063)  |    | 4.44e-02 | 0.52 |
| TBX15(M01264)  |   | 4.49e-02 | 0.52 |
| Gfi1(M01067)   |  | 4.55e-02 | 0.52 |
| mTERF(M01245)  |  | 4.69e-02 | 0.52 |
| MEF-3(M00319)  |  | 4.73e-02 | 0.52 |



Dataset S7

TRANSFAC MOTIFS

In higher H3K27acetylated sites in CHL2:

| Clustered PWMs                                                                                                                                                                                                             | Logo                                                                                 | P-Value  | ROC AUC |
|----------------------------------------------------------------------------------------------------------------------------------------------------------------------------------------------------------------------------|--------------------------------------------------------------------------------------|----------|---------|
| TCF-4(M02033), LEF-1(M02019)                                                                                                                                                                                               |    | 7.09e-05 | 0.54    |
| Barbie(M00238)                                                                                                                                                                                                             |    | 8.91e-05 | 0.54    |
| HB9(M01349), Vax-2(M01327), Gbx2(M01382), Msx-2(M01393), HOXA7(M01394), HOXB7(M01396), Msx-1(M01412), Nkx1-1(M01334), Evx-1(M01475)                                                                                        |    | 3.48e-04 | 0.54    |
| dlx5(M01388), Barx1(M01340), HoxB5(M01319), HOXC-8(M01321), GSH2(M01326), HOXA3(M01337), HOXD3(M01338), HOXA6(M01392), Vax-1(M01397), HoxA2(M01402), ipf1(M01438), Bsx(M01442), Mox1(M01443), HOXD1(M01448), HOXA5(M01452) |    | 7.55e-04 | 0.54    |
| C/EBPdelta(M00621), C/EBPbeta(M00109), C/EBP(M00201), CEBPE(M01868)                                                                                                                                                        |    | 8.56e-04 | 0.53    |
| REST(M01256), NRSF(M00256), NRSE(M00325)                                                                                                                                                                                   |    | 2.21e-03 | 0.53    |
| Oct-1(M00161), OCT-x(M00210)                                                                                                                                                                                               |    | 2.78e-03 | 0.53    |
| SRF(M00215), SRF(M00186)                                                                                                                                                                                                   |    | 2.91e-03 | 0.53    |
| HNF-1A(M02013), HP1(M00725), HNF1(M01011)                                                                                                                                                                                  |   | 3.52e-03 | 0.53    |
| Brachyury(M00150)                                                                                                                                                                                                          |  | 4.35e-03 | 0.53    |
| AhR:Arnt(M00235), AhR:Arnt(M00237)                                                                                                                                                                                         |  | 6.13e-03 | 0.53    |
| EAR2(M01728)                                                                                                                                                                                                               |  | 6.23e-03 | 0.53    |
| Alx-4(M00619)                                                                                                                                                                                                              |  | 7.36e-03 | 0.53    |
| NERF1a(M00531), c-Ets-1(M00339), c-Ets-2(M00340), Ets(M00771)                                                                                                                                                              |  | 8.25e-03 | 0.53    |
| NF-1(M00193), NF-1(M00806)                                                                                                                                                                                                 |  | 8.67e-03 | 0.53    |
| RFX(M00975)                                                                                                                                                                                                                |  | 8.85e-03 | 0.53    |
| Gfi1(M01067), Gfi-1(M00250)                                                                                                                                                                                                |  | 9.15e-03 | 0.52    |
| HIF1(M00797)                                                                                                                                                                                                               |  | 9.46e-03 | 0.52    |
| Bach1(M00495), AP-1(M00517), AP-1(M00924)                                                                                                                                                                                  |  | 9.82e-03 | 0.52    |

|                                                           |                                                                                      |          |      |
|-----------------------------------------------------------|--------------------------------------------------------------------------------------|----------|------|
| GABP-beta(M01876), ELF1(M01266), Tel-2(M00678)            |    | 1.06e-02 | 0.52 |
| AREB6(M00415), E2F6(M01252)                               |    | 1.23e-02 | 0.52 |
| UF1H3BETA(M01068), Zfp281(M01597)                         |    | 1.27e-02 | 0.52 |
| USF(M00187)                                               |    | 1.29e-02 | 0.52 |
| TGIF1(M01346)                                             |    | 1.30e-02 | 0.52 |
| Pax-1(M00326)                                             |    | 1.39e-02 | 0.52 |
| AP-2(M00915), RNF96(M01199)                               |    | 1.48e-02 | 0.52 |
| Barx-2(M01431)                                            |    | 1.51e-02 | 0.52 |
| AP-1(M00199), FRA1(M01267), AP-1(M00174), CREB(M00801)    |    | 1.63e-02 | 0.52 |
| HES1(M01009)                                              |    | 1.74e-02 | 0.52 |
| E2F(M00024)                                               |   | 1.79e-02 | 0.52 |
| SMAD3(M00701), SMAD4(M00733)                              |  | 1.95e-02 | 0.52 |
| HTF(M00538)                                               |  | 2.13e-02 | 0.52 |
| Obox2(M01364), Otx1(M01366), Obox3(M01466), Pitx1(M01484) |  | 2.27e-02 | 0.52 |
| Muscle(M00320)                                            |  | 2.41e-02 | 0.52 |
| Cphx(M01478)                                              |  | 2.45e-02 | 0.52 |
| AP-2(M00800)                                              |  | 2.51e-02 | 0.52 |
| HMX1(M01481)                                              |  | 2.64e-02 | 0.52 |
| CHX10(M00437)                                             |  | 2.66e-02 | 0.52 |
| E2F(M00425)                                               |  | 2.78e-02 | 0.52 |
| TBX15(M01263)                                             |  | 2.84e-02 | 0.52 |
| N-Myc(M00055)                                             |  | 2.86e-02 | 0.52 |

|                                          |                                                                                      |          |      |
|------------------------------------------|--------------------------------------------------------------------------------------|----------|------|
| PPAR(M00528), PPARalpha:RXRalpha(M00242) |    | 2.88e-02 | 0.52 |
| Ikaros(M01169)                           |    | 2.98e-02 | 0.52 |
| Nanog(M01123), REX1(M01695)              |    | 3.01e-02 | 0.52 |
| MEF-3(M00319)                            |    | 3.03e-02 | 0.52 |
| MTF-1(M00650)                            |    | 3.03e-02 | 0.52 |
| Pax-9(M00329)                            |    | 3.18e-02 | 0.52 |
| AhR(M00139)                              |    | 3.64e-02 | 0.52 |
| TEF-1(M00704)                            |    | 3.76e-02 | 0.52 |
| ZABC1(M01306)                            |    | 3.93e-02 | 0.52 |
| Dax1(M01248)                             |   | 4.00e-02 | 0.52 |
| CAC-binding(M00720)                      |  | 4.01e-02 | 0.52 |
| MEIS1B:HOXA9(M00421)                     |  | 4.01e-02 | 0.52 |
| CACCC-binding(M00721), Muscle(M00321)    |  | 4.03e-02 | 0.52 |
| ATF2:c-Jun(M00041)                       |  | 4.03e-02 | 0.52 |
| CNOT3(M01253)                            |  | 4.22e-02 | 0.52 |
| Evx2(M01386)                             |  | 4.23e-02 | 0.52 |
| E2F-1(M00938)                            |  | 4.36e-02 | 0.52 |
| D-Type(M00334)                           |  | 4.48e-02 | 0.52 |
| SOX5(M00042)                             |  | 4.54e-02 | 0.52 |
| FOXO1(M01968)                            |  | 4.62e-02 | 0.52 |
| PTF1-beta(M00657)                        |  | 4.63e-02 | 0.52 |
| CP2/LBP-1c/LSF(M00947)                   |  | 4.87e-02 | 0.52 |

## Dataset S7

Enriched motifs in the promoters of genes that are differentially-expressed in the striatum of 4-week old R6/1 mice:

| <i>MotifID</i> | <i>Motif_genes</i> | <i>pval</i> | <i>Logo</i>                                                                          |
|----------------|--------------------|-------------|--------------------------------------------------------------------------------------|
| M00644         | Ubp1               | 3.91e-05    |    |
| M00131         | Foxa2              | 7.91e-05    |    |
| M04595         | Sall2              | 8.14e-05    |    |
| M02836         | Zic2               | 0.000141    |    |
| M00720         | CAC-BP             | 0.000154    |    |
| M01973         | Plag1              | 0.000209    |    |
| M01224         | NFKB1 Rela         | 0.00036     |    |
| M01028         | Rest               | 0.000494    |    |
| M01202         | Vdr Rxra           | 0.000605    |  |
| M02023         | Maz                | 0.000801    |  |
| M02737         | Ascl2              | 0.000842    |  |
| M04142         | Tead1              | 0.000847    |  |
| M00008         | Sp1                | 0.000857    |  |
