# Supplementary material
Source: PubMed Central journal article supplement (PMC6900520)
Supplement: pnas.1908113116.sd11.pdf [file pnas.1908113116.sd11.pdf]

| motif_name                                                                                                                                  | motif                        | motif_index | pvalue  | cverror |
|---------------------------------------------------------------------------------------------------------------------------------------------|------------------------------|-------------|---------|---------|
| EIk-1(ELK1,EIk1), EIk-1(ELK1,EIk1)                                                                                                          | .ACCGGAAGT. (2556)           | 170         | 2.4e-88 | 0.38    |
| ATF2(ATF2), E4BP4(FIL3,NFIL3), VBP(TEF), HLF(lf,HLF)                                                                                        | gTTaCrT.a (3065)             | 38          | 3e-34   | 0.42    |
| HOXC11(HOXC11,OXC11), HOXC10(HOXC10,OXC10), HOXA11(Hoxa11), HOXD12(hoxd12), HOXC12(OXC12,HOXC12)                                            | ...GtCGtaAA. (2772)          | 206         | 4.8e-30 | 0.41    |
| IRF-7(IRF7), IRF(IRF-10)                                                                                                                    | gAAw.cGaAa.y (2940)          | 68          | 2.3e-22 | 0.45    |
| MIZF(MIZF)                                                                                                                                  | CGGACGtK (2818)              | 173         | 3.6e-14 | 0.43    |
| E2F(E2F-1)                                                                                                                                  | t.ssCGSGAAAaykr (2543)       | 3           | 8e-14   | 0.44    |
| MECP2(MECP2)                                                                                                                                | CCGm.ttw. (2839)             | 198         | 1.9e-11 | 0.45    |
| HIF1(Amt,IF1A,HIF1A,ARNT), HIF1(Amt,IF1A,HIF1A,ARNT)                                                                                        | g..kACGTGc.s. (2948)         | 116         | 3.3e-09 | 0.45    |
| XBP-1(XBP1), HTF(XBP1)                                                                                                                      | ....gmCrCGtca. (2953)        | 85          | 3.6e-09 | 0.43    |
| STAT1(STAT1), STAT3(STAT3)                                                                                                                  | .....TTCCsGGAA.tg.s (2770)   | 37          | 2.8e-08 | 0.45    |
| Octamer(POU3F3)                                                                                                                             | ...tatGCAtaa.... (2708)      | 205         | 5.4e-08 | 0.47    |
| GZF1(Gzf1)                                                                                                                                  | TGCGC.TctatA (2293)          | 154         | 7.2e-08 | 0.46    |
| DEAF1(Deaf1), DEAF1(Deaf1)                                                                                                                  | s...yycggg.ryttCCG... (2937) | 143         | 1.4e-07 | 0.45    |
| E2F(E2F-1), E2F-1:DP-1(TFDP1,E2F1), E2F-1:DP-2(TFDP2,E2F1), E2F-4:DP-1(E2F4,TFDP1), E2F-4:DP-2(E2F4,TFDP2), Rb:E2F-1:DP-1(TFDP1,E2F1,RB1)   | ttTssCGS (2842)              | 109         | 1.4e-07 | 0.47    |
| NRF-1(RF1,NRF1)                                                                                                                             | CGCrTGCGCr (2664)            | 99          | 4e-07   | 0.47    |
| EIk-1(ELK1,EIk1), EIk-1(ELK1,EIk1), c-Ets-1(p54)(ETS1,Ets1), c-Ets-1 p54(ETS1,Ets1), SAP-1a(ELK4), FLI1(FLI1)                               | .sCGGAwgy... (2999)          | 157         | 9e-07   | 0.47    |
| Pax-6(pax6a), Pax-3(PAX3)                                                                                                                   | .....sgtsaCGsty... (3135)    | 54          | 6.6e-06 | 0.45    |
| Whn(Foxn1), AhR(AHR)                                                                                                                        | ...gACGC.. (3033)            | 55          | 9.4e-06 | 0.47    |
| Brn-2(POU3F2)                                                                                                                               | cat.s.wAAt.mr. (2895)        | 29          | 9.7e-06 | 0.47    |
| AhR:Arnt(AHR), AhR:Arnt(AHR)                                                                                                                | k.....k.GCGTGc.s (3066)      | 40          | 1.7e-05 | 0.47    |
| CDP(CUTL1,utl1), Homez(Homez)                                                                                                               | .....atCGttt.... (2848)      | 222         | 2.1e-05 | 0.46    |
| Arnt(Arnt,ARNT)                                                                                                                             | .....kCACGTGm..... (2864)    | 86          | 0.0002  | 0.47    |
| E2F(T13683), E2F(T13683), E2F(T13683), E2F-1(E2F-1), E2F(TFDP1), E2F(TFDP1), E2F(TFDP1), E2F-1(E2F-1)                                       | yttsGCGsg (2873)             | 128         | 0.00021 | 0.47    |
| Pax-3(PAX3)                                                                                                                                 | tCGtCaCrcyy.. (2834)         | 57          | 0.00027 | 0.46    |
| MECP2(MECP2)                                                                                                                                | CCGGs.....awwy (2908)        | 197         | 0.00037 | 0.47    |
| Tax/CREB(CREB1)                                                                                                                             | .ggGG.TgACG.m.. (2859)       | 21          | 0.00045 | 0.48    |
| Cdc5(DC5L,CDC5L)                                                                                                                            | G.kttAacrtar (2649)          | 75          | 0.0018  | 0.47    |
| IRF-1(IRF1), IRF-2(IRF-2,IRF2), ISGF-3(STAT2,STAT1,ISGF3g,ISGF3G,T01573,T01494,T01492), ICSBP(lrf8), IRF(IRF-10), BLIMP1(PRDM1), IRF3(IRF3) | s...stTTC..Ttyy (2962)       | 114         | 0.0028  | 0.47    |
| Oct-1(POU2F1), POU3F2(POU3F2)                                                                                                               | ..tATGstAATT (1530)          | 43          | 0.003   | 0.48    |
| Nkx3-1(NKX31,KX3-1)                                                                                                                         | ..tAAGTRyr. (2025)           | 67          | 0.0038  | 0.48    |
