# Supplementary material
Source: PubMed Central journal article supplement (PMC6900520)
Supplement: pnas.1908113116.sd12.pdf [file pnas.1908113116.sd12.pdf]

# Higher Elk-1 bound sites in R6/1:

| motif_name                                                                                                                                                                                                                                                | motif                              | motif_index | pvalue  | cerror |
|-----------------------------------------------------------------------------------------------------------------------------------------------------------------------------------------------------------------------------------------------------------|------------------------------------|-------------|---------|--------|
| Pax-6(pax6a), Pax-3(PAX3)                                                                                                                                                                                                                                 | .....gtsaCGsty... (1804)           | 54          | 2.8e-07 | 0.47   |
| Whn(Foxn1), AhR(AHR)                                                                                                                                                                                                                                      | a..sACGC.. (1794)                  | 55          | 5.1e-06 | 0.45   |
| XBP-1(XBP1), HTF(XBP1)                                                                                                                                                                                                                                    | .w...mCACGtca. (1635)              | 85          | 6.7e-05 | 0.47   |
| CP2(TCF2L1), CP2/LBP-1c/LSF(TCF2L1), LBP9(TCF2L1)                                                                                                                                                                                                         | gCTGG.t....Cy.S (1917)             | 129         | 0.00011 | 0.47   |
| E2F(T13683), E2F(T13683), E2F(T13683), E2F-1(E2F-1), E2F(TFDP1), E2F(TFDP1), E2F(TFDP1), E2F-1(TFDP1), E2F-1(E2F-1)                                                                                                                                       | yTtsGCGsg (1426)                   | 128         | 0.00019 | 0.45   |
| AhR, Arnt, HIF-1(AHR), HIF-2alpha(EPAS1)                                                                                                                                                                                                                  | rCGTG.. (1978)                     | 135         | 0.00047 | 0.46   |
| NERF1a(ELF2)                                                                                                                                                                                                                                              | yr.CAGGAAGyr.sks.s (1023)          | 84          | 0.00085 | 0.47   |
| NRF-1(RF1,NRF1)                                                                                                                                                                                                                                           | CGCrTGCGCr (865)                   | 99          | 0.0009  | 0.47   |
| HSF1(LOC420362)                                                                                                                                                                                                                                           | .tTCyrGrrs.tTCkym (935)            | 150         | 0.00096 | 0.47   |
| LUN-1(TOPORS)                                                                                                                                                                                                                                             | TCCCAGC.aCtttGGGA (529)            | 76          | 0.0018  | 0.47   |
| STAT5A (homotetramer)(STAT5A)                                                                                                                                                                                                                             | TtCs..GaA.....ttcc..g.r (1177)     | 70          | 0.0044  | 0.48   |
| Roaz(Zfp423)                                                                                                                                                                                                                                              | GCACCCawGGGTGm (552)               | 73          | 0.011   | 0.48   |
| ZID(ZID)                                                                                                                                                                                                                                                  | gGCTCyaksryc (1588)                | 15          | 0.015   | 0.47   |
| Rhox11(Rhox11), Rhox11(Rhox11)                                                                                                                                                                                                                            | ....cGcTGTwaw.... (1794)           | 213         | 0.018   | 0.48   |
| RBP-Jkappa(Rbpj), RBP-Jkappa(Rbpj)                                                                                                                                                                                                                        | ..cGTGgGAA. (1839)                 | 162         | 0.024   | 0.48   |
| TGIF(TGIF), TGIF1(TGIF), MRG2(Meis3), TGIF2(TGIF2), PKNOX2(PKNOX2), Meis1(Meis1,MEIS1), PREP1(PKNOX1), Meis2(Meis2)                                                                                                                                       | ....AsCTGTCAa.. (1266)             | 232         | 0.025   | 0.47   |
| HEN1(Nhlh1), HEN1(Nhlh1)                                                                                                                                                                                                                                  | gg.c.CAgcTGcg.ccc (1274)           | 9           | 0.026   | 0.48   |
| GATA-1(Gata1), Hdx(Hdx), CDP(CUTL1,utl1), CDP(CUTL1,utl1)                                                                                                                                                                                                 | r....ttgATya..... (2057)           | 209         | 0.026   | 0.48   |
| myogenin / NF-1(NFIC,FIC)                                                                                                                                                                                                                                 | crsctsyks..tytgGcrss.GCCar.. (762) | 7           | 0.026   | 0.48   |
| MECP2(MECP2)                                                                                                                                                                                                                                              | CCGm.tww. (1390)                   | 198         | 0.026   | 0.48   |
| CNOT3(Cnot3)                                                                                                                                                                                                                                              | ssCCGCss.s (1195)                  | 188         | 0.027   | 0.48   |
| E2F-1(E2F-1)                                                                                                                                                                                                                                              | kksgCGssr.a..G.m (1202)            | 127         | 0.027   | 0.47   |
| RNF96(Trim28)                                                                                                                                                                                                                                             | scCCGCrGCc (1673)                  | 175         | 0.027   | 0.48   |
| E2F(E2F-1)                                                                                                                                                                                                                                                | t.sSCGsGAAAAykr (581)              | 3           | 0.036   | 0.47   |
| AP-4(TFAP4), AP-4(TFAP4), HEB(TCF12), AP-4(TFAP4)                                                                                                                                                                                                         | r.CaGcTGc (2327)                   | 124         | 0.04    | 0.48   |
| OTP(Otp), Vsx1(Vsx1), HOXA7(hoxa7), Lhx5(LHX5,Lhx5), Oct-1(POU2F1), PMX2B(PHOX2B), Imx1b(LMX1B), Lhx9 (Lhx9), HOXC4(OXC4,HOXC4), HOXA4(Hox-1.4), HOXC6(HOXC6), Alx-4(Alx-4), Lim-1(Lhx1), HOXB4(hoxb4), HOXC5 (HOXC5), Uncx-4.1(Uncx4.1), Octamer(POU3F2) | c...tAATTAa... (1038)              | 219         | 0.045   | 0.48   |
| CTCF(Ctcf), CTCF(Ctcf)                                                                                                                                                                                                                                    | ...cCas.aGrkGGcrs (1514)           | 191         | 0.045   | 0.47   |
| MTF-1(MTF1)                                                                                                                                                                                                                                               | tsTGCrCmCggccs (1097)              | 98          | 0.046   | 0.48   |
| MEF-2(Mef2a), MEF-2(MEF2A), MEF-2(MEF2A), MEF2A(Mef2a)                                                                                                                                                                                                    | rGyTATtTTAr (557)                  | 199         | 0.058   | 0.48   |
| ZBRK1(ZNF350)                                                                                                                                                                                                                                             | GGGsmrCAG...tTk (964)              | 159         | 0.079   | 0.47   |

## Lower Elk-1 bound sites in R6/1:

| motif_name                                                                                                                                           | motif                         | motif_index | pvalue  | cerror |
|------------------------------------------------------------------------------------------------------------------------------------------------------|-------------------------------|-------------|---------|--------|
| Egr-1(EGR1), NGFI-C(EGR4,Egr4), Egr-3(Egr3), Egr-2(Egr2,EGR2)                                                                                        | .tGCGtrGGcGk (592)            | 42          | 1.4e-11 | 0.42   |
| XBP-1(XBP1), HTF(XBP1)                                                                                                                               | .w...mCACGtca. (862)          | 85          | 5.3e-05 | 0.46   |
| Helios A(IKZF2)                                                                                                                                      | .GGAaaa (1474)                | 144         | 0.00018 | 0.46   |
| Brachyury(T)                                                                                                                                         | ....TsrCAcsTAGGTGTsAaatk (99) | 30          | 0.00019 | 0.47   |
| AhR, Arnt, HIF-1(AHR), HIF-2alpha(EPAS1)                                                                                                             | rCGTG.. (1177)                | 135         | 0.00025 | 0.45   |
| FPM315 (ZNF263)(ZNF263)                                                                                                                              | s.gGGAGsAss. (1098)           | 233         | 0.00032 | 0.46   |
| Whn(Foxn1), AhR(AHR)                                                                                                                                 | a..sACGCy. (1067)             | 55          | 0.00037 | 0.45   |
| RNF96(Trim28)                                                                                                                                        | scCCgCrGCc (986)              | 175         | 0.00076 | 0.46   |
| Ik-1(Ikzf1), Ik-3(Ikzf1)                                                                                                                             | y.yGGGAAt... (1081)           | 16          | 0.001   | 0.46   |
| Oct-4 (POU5F1)(POU5F1), Oct-4 (POU5F1)(POU5F1)                                                                                                       | wTTsw.wTgcwraw (854)          | 165         | 0.0017  | 0.45   |
| RBP-Jkappa(Rbpj), RBP-Jkappa(Rbpj)                                                                                                                   | ..cGTGgGAA. (1034)            | 162         | 0.0019  | 0.46   |
| PEA3(Etv4), ELF1(Elf1), GABP-alpha(GABPA)                                                                                                            | cTTCCk (1355)                 | 242         | 0.002   | 0.47   |
| NF-1(NFIC,FIC), CTF1(NFIC,FIC)                                                                                                                       | tTGGC..... (1341)             | 34          | 0.0022  | 0.47   |
| E2F(E2F-1)                                                                                                                                           | twSsCGsGAAAAykr (205)         | 3           | 0.0023  | 0.47   |
| KAISO(Zbtb33)                                                                                                                                        | .TCCTGC.A. (912)              | 163         | 0.0024  | 0.46   |
| CTCF(Ctcf), CTCF(Ctcf)                                                                                                                               | ...cCas.aGrkGGcrs (854)       | 191         | 0.0024  | 0.47   |
| Nrf-2(NFE2L2,FE2L2)                                                                                                                                  | .tsctgAGTCAk. (958)           | 121         | 0.0026  | 0.46   |
| MTF-1(MTF1)                                                                                                                                          | tsTGCrCmCggccs (590)          | 98          | 0.0026  | 0.47   |
| TBX15(Tbx15)                                                                                                                                         | AGGTGTkaAgGTGTGAAA (87)       | 194         | 0.0068  | 0.47   |
| GCM(GCM1,M1)                                                                                                                                         | c..rCCCgCAtk (841)            | 94          | 0.0077  | 0.47   |
| E2F(E2F-1), E2F-1:DP-1(TFDP1,E2F1), E2F-1:DP-2(TFDP2,E2F1), E2F-4:DP-1(E2F4,TFDP1), E2F-4:DP-2 (E2F4,TFDP2), Rb:E2F-1:DP-1(TFDP1,E2F1,RB1)           | tTTssCGS (778)                | 109         | 0.0078  | 0.47   |
| c-Myc:Max(c-myc,MYC), Max(MAX,Max), c-Myc:Max(c-myc,MYC), Arnt(Arnt,ARNT), c-Myc:Max(c-myc,MYC), Stra13 (BHLHB2), c-Myc(c-myc,MYC), c-Myc(c-myc,MYC) | .kk..CACGTG (859)             | 41          | 0.0097  | 0.47   |
| MAF(MAF)                                                                                                                                             | trgrGGAAGTkkssk (334)         | 97          | 0.012   | 0.47   |
| STAT5A (homotetramer)(STAT5A)                                                                                                                        | TtC...GaA.....Ttcc..g.r (507) | 70          | 0.013   | 0.47   |
| Nkx6-2(Nkx6-2), dlx3(Dlx-3), Dlx-2(Dlx-2), Dlx7(DLX4)                                                                                                | ....rTAATTrcm (728)           | 216         | 0.017   | 0.47   |
| S8(Prrx2), CHX10(Chx10), Pax-7(PAX7), pax6(pax6a), Shox2(SHOX2), OG-2(Nobox)                                                                         | ..yyAATTrr (1042)             | 208         | 0.018   | 0.47   |
| NERF1a(ELF2)                                                                                                                                         | yr.CAGGAAGyr.stsrs (491)      | 84          | 0.018   | 0.47   |
| RFX1 (EF-C)(Rfx1)                                                                                                                                    | mrwyrCyakGsaAm (610)          | 90          | 0.018   | 0.48   |
| Lyf-1(Ikzf1), Ikaros(Ikzf1)                                                                                                                          | kytGGGAgg (1386)              | 171         | 0.02    | 0.47   |
| MEIS1A:HOXA9(HOXA9), MEIS1B:HOXA9(HOXA9)                                                                                                             | TGACAskTTtAyrr (416)          | 61          | 0.025   | 0.47   |
